# Supplementary material
Source: MDPI journal article supplement (https://www.mdpi.com/2227-9717/10/8/1538)
Supplement: s1 [file s1]

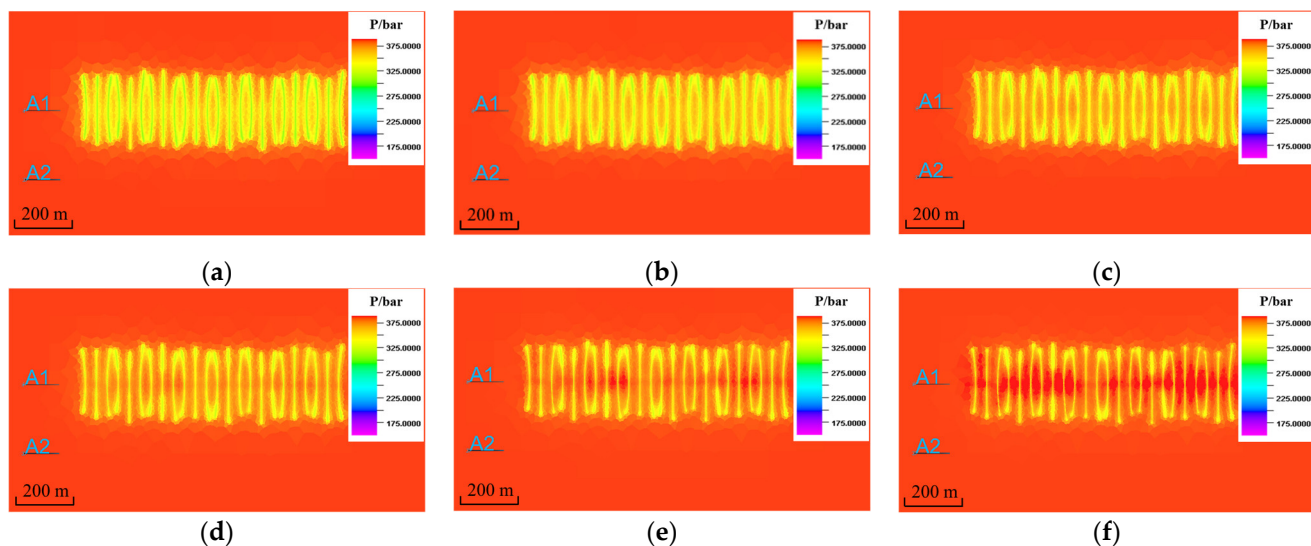

**Figure S1.** Pressure distribution corresponding to different injection/production ratios after 1-year production, (a) 0.2; (b) 0.4; (c) 0.6; (d) 0.8; (e) 1.0; (f) 1.2.

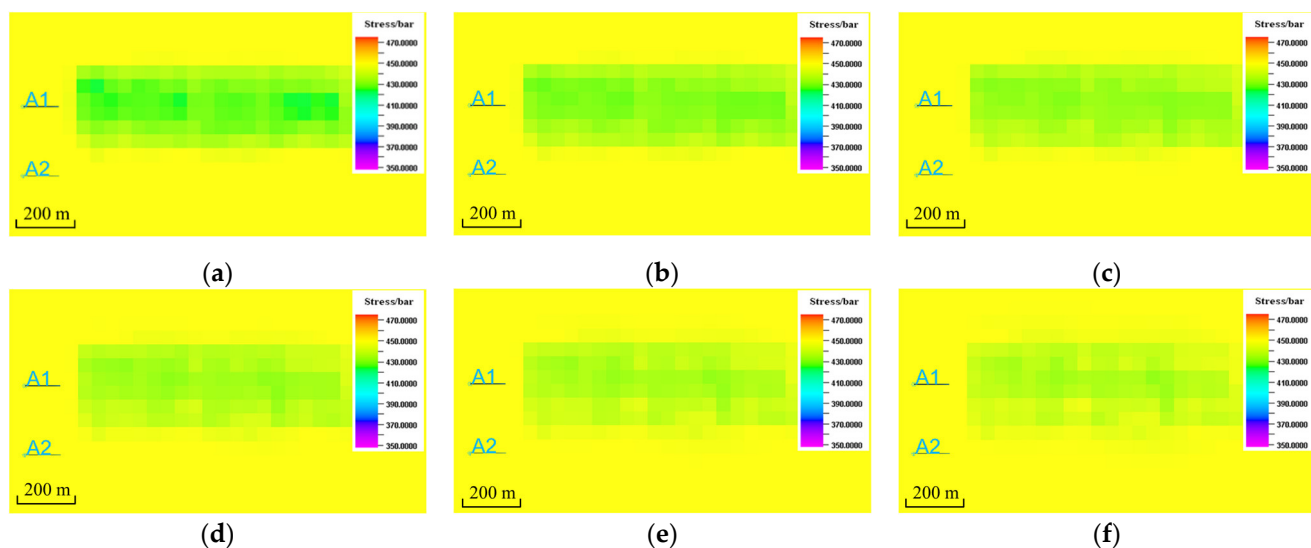

**Figure S2.** Minimal horizontal principal stress distribution corresponding to different injection/production ratios after 1-year production, (a) 0.2; (b) 0.4; (c) 0.6; (d) 0.8; (e) 1.0; (f) 1.2.

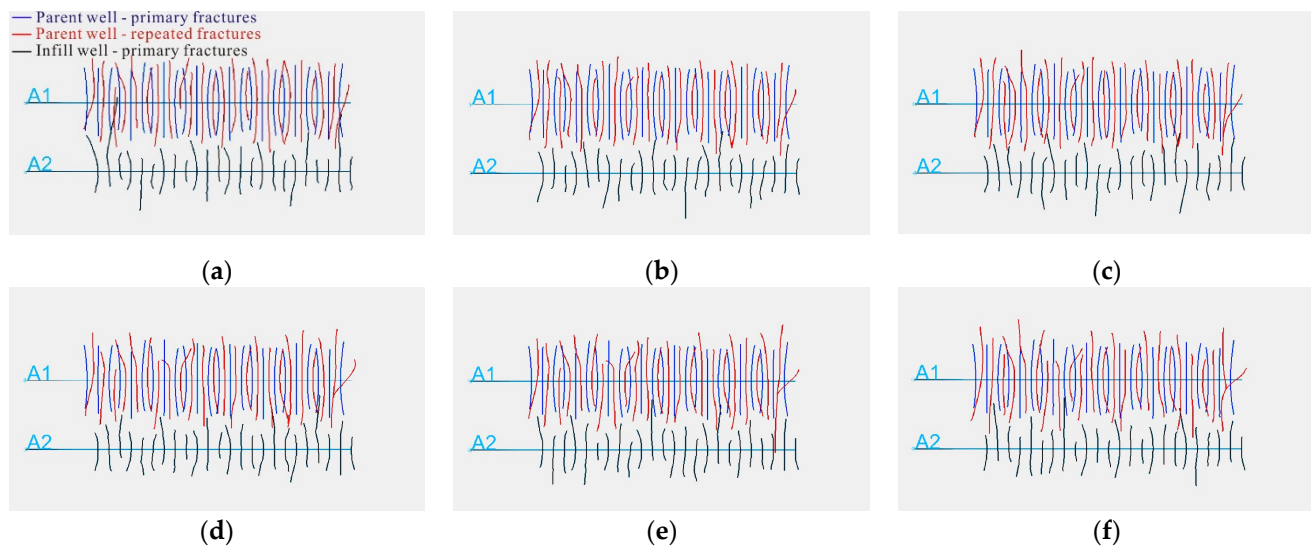

**Figure S3.** Fractures morphology of parent well and infill well corresponding to different injection/production ratios after 1-year production, (a) 0.2; (b) 0.4; (c) 0.6; (d) 0.8; (e) 1.0; (f) 1.2.

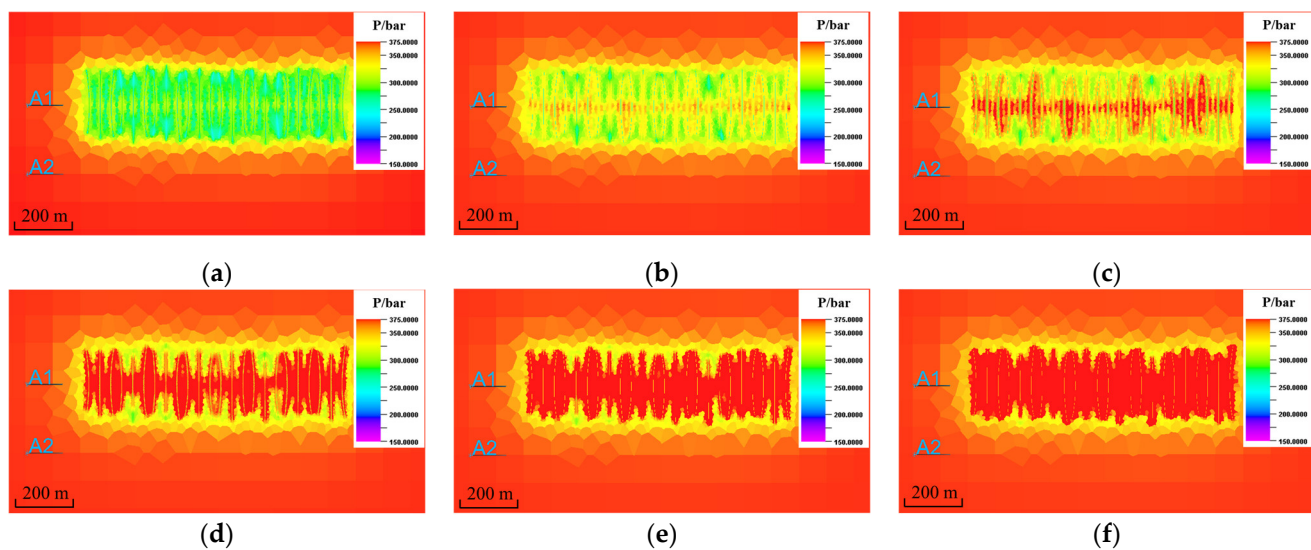

**Figure S4.** Pressure distribution corresponding to different injection/production ratios after 4-years production, (a) 0.2; (b) 0.4; (c) 0.6; (d) 0.8; (e) 1.0; (f) 1.2.

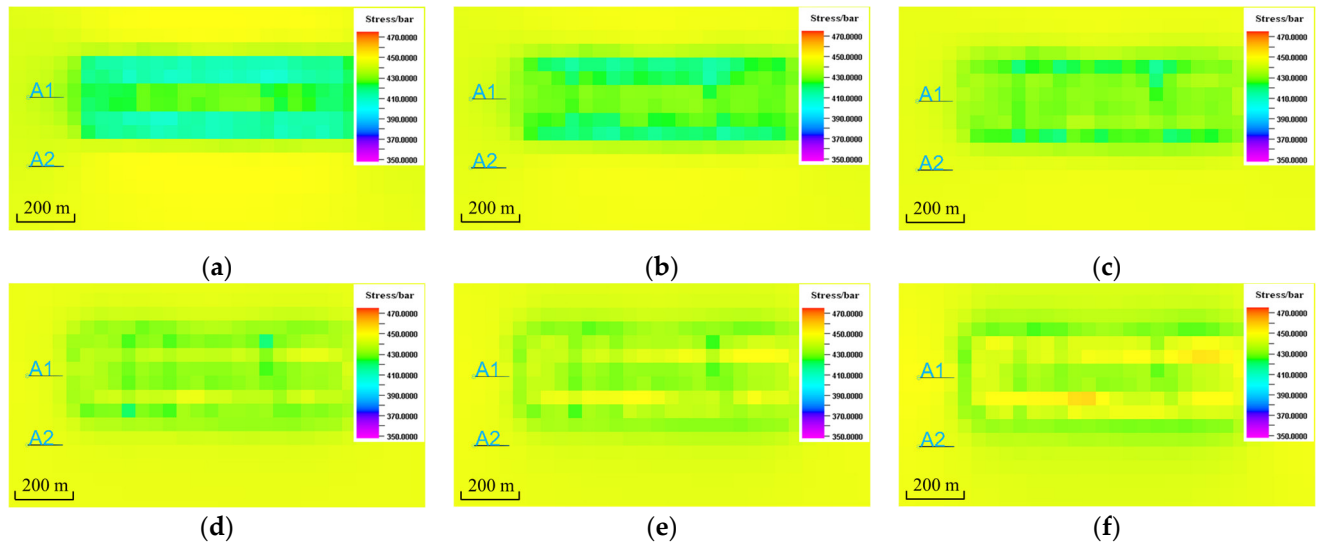

**Figure S5.** Minimal horizontal principal stress distribution corresponding to different injection/production ratios after 4-years production, (a) 0.2; (b) 0.4; (c) 0.6; (d) 0.8; (e) 1.0; (f) 1.2.

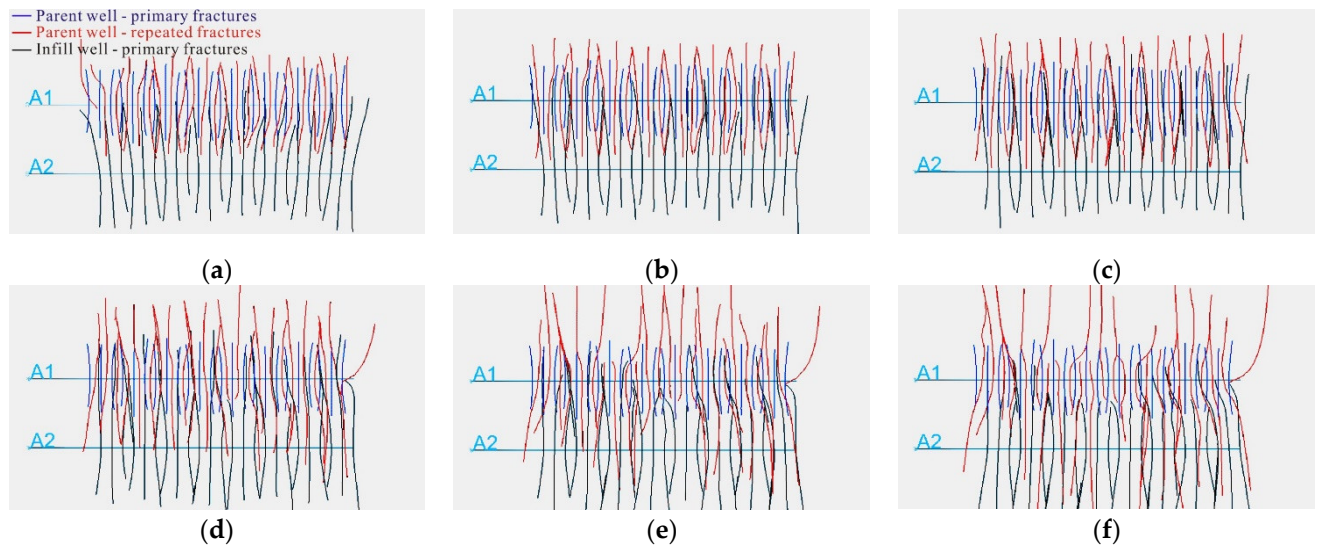

**Figure S6.** Fractures morphology of parent well and infill well corresponding to different injection/production ratios after 4-years production, (a) 0.2; (b) 0.4; (c) 0.6; (d) 0.8; (e) 1.0; (f) 1.2.
